# Supplementary material for: Genetic Analysis and Status of Brown Bear Sub-Populations in Three National Parks of Greece Functioning as Strongholds for the Species’ Conservation
Source: MDPI journal article supplement (doi:10.3390/genes13081388), 2022-08-04
Supplement: s1 [file s1]

## **Supplementary materials and methods**

### ***Capillary electrophoresis***

A QX DNA Size Marker (Qiagen) with 10 fragment sizes ranging in size from 25 to 500 bp was used to identify the PCR products' size. A QX Alignment Marker (Qiagen), which consisted of 15-600 bp fragments, was injected into the cartridge with each sample.

The OM800 method in the ScreenGel® software (Qiagen) was used for all analyses; this corresponds to a 10sec sample injection time at 5 kV and 800sec separation time at 3 kV. The QIAxcel system injected 0.1 µl of 20 µl PCR products into a cartridge for analysis. The retention time of the PCR fragments relative to the 15-bp and 600-bp QX Alignment Marker fragments was calculated using the ScreenGel software (Qiagen). The PCR product sizes were then determined by comparing the retention time with the QX DNA Size Marker. The ScreenGel software produces a digital gel image and an electropherogram for fragment analysis (Figure 1). (Indicative photos of the digital gel images and electropherograms of PCR products are shown in supplementary material – Figure S1)

The high detection sensitivity provided by the QIAxcel Advanced System enables robust results even with low concentrations of nucleic acid. QIAxcel Advanced system has a high resolution for fragments smaller than 0.5 kb and ensures high accuracy and confidence in data interpretation. Sample consumption is less than 0.1 µl per analysis, saving precious samples for further downstream analysis.

***Figure S1: Photos of the digital gel images and electropherograms via Qiaxcel***

**G10H: allele 238bp**

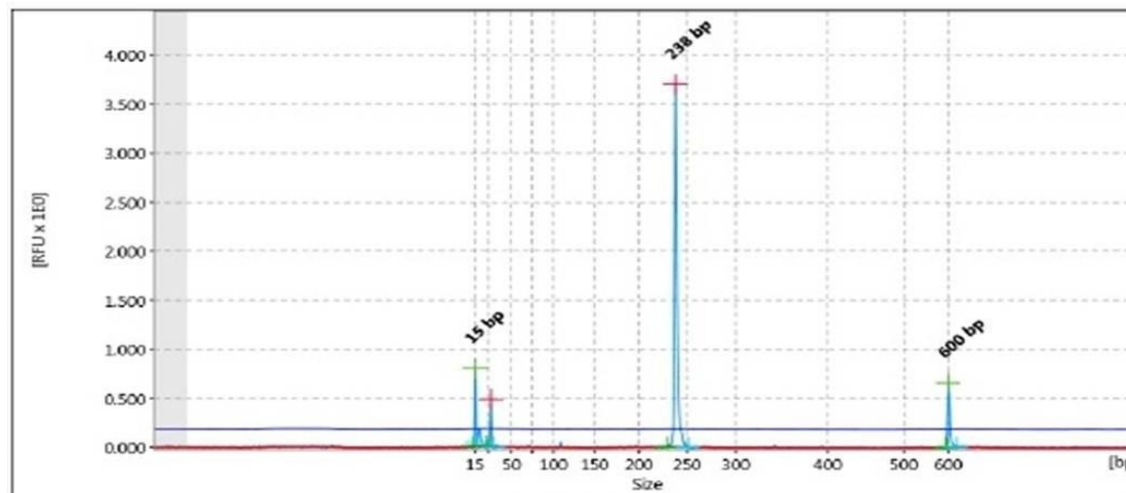

**Figure: 149**

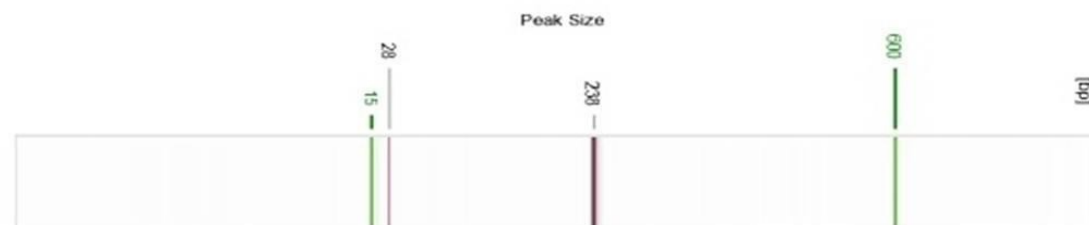

## G1D: allele 184bp

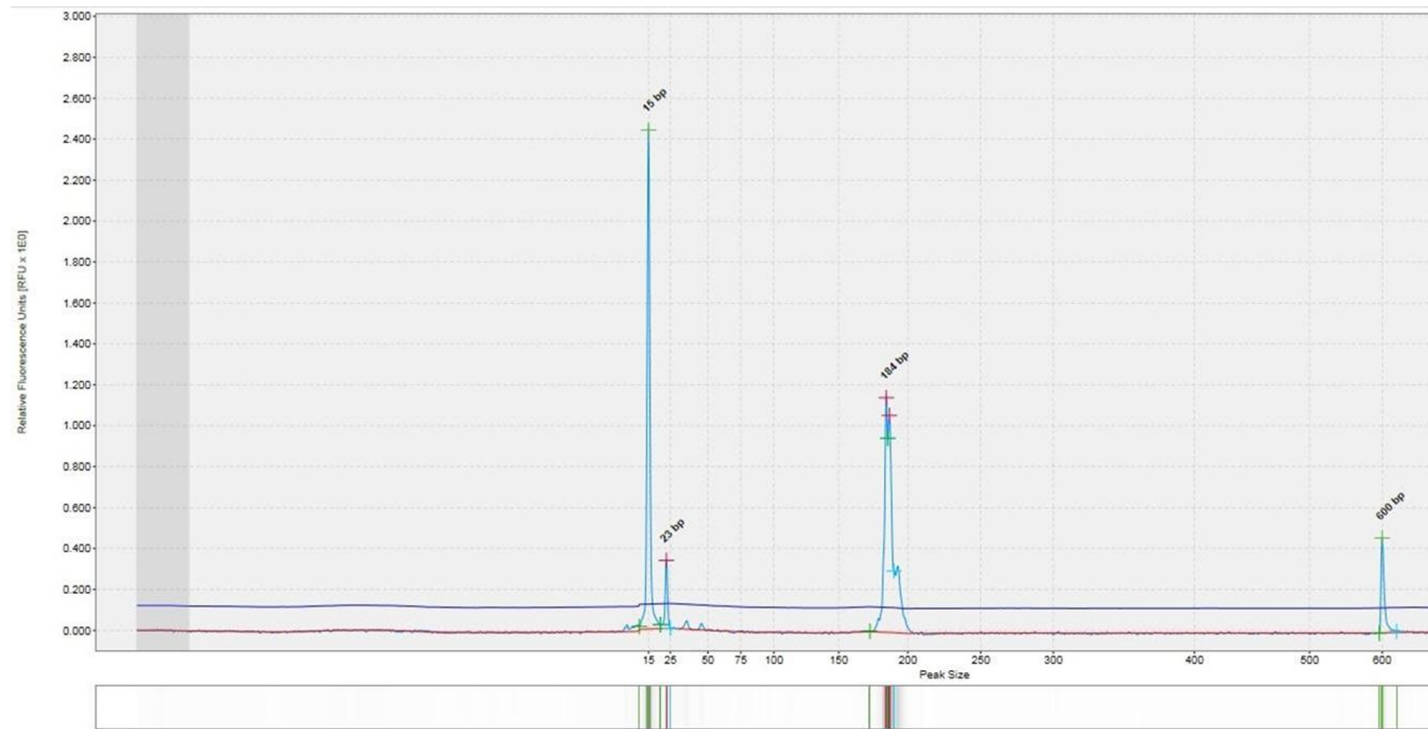

## G10C: 97bp

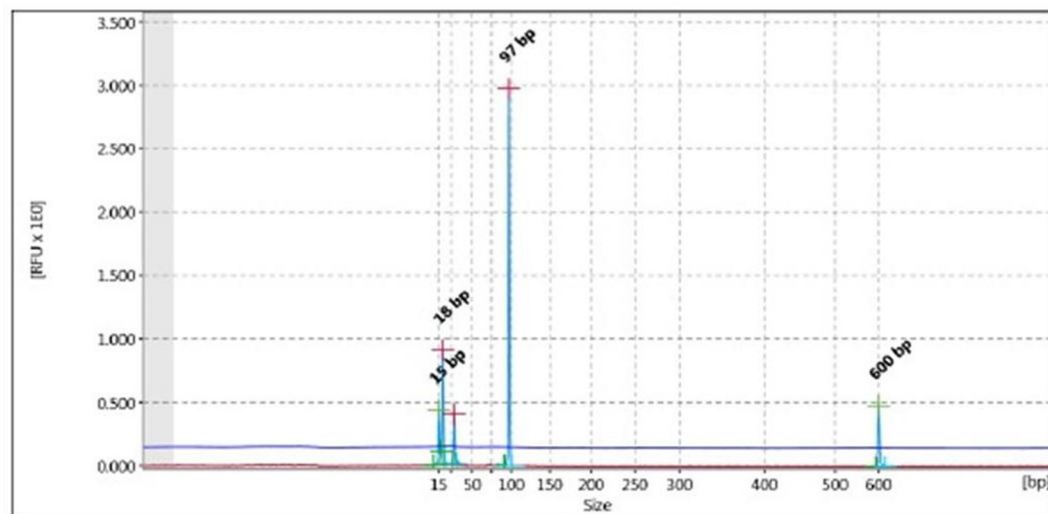

Figure: 35

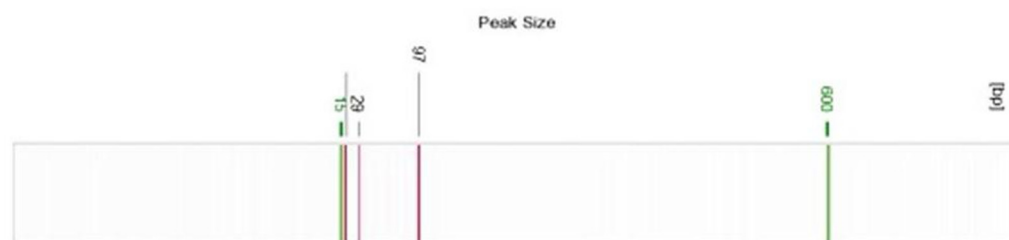

## Mu26: 188 – 192 bp

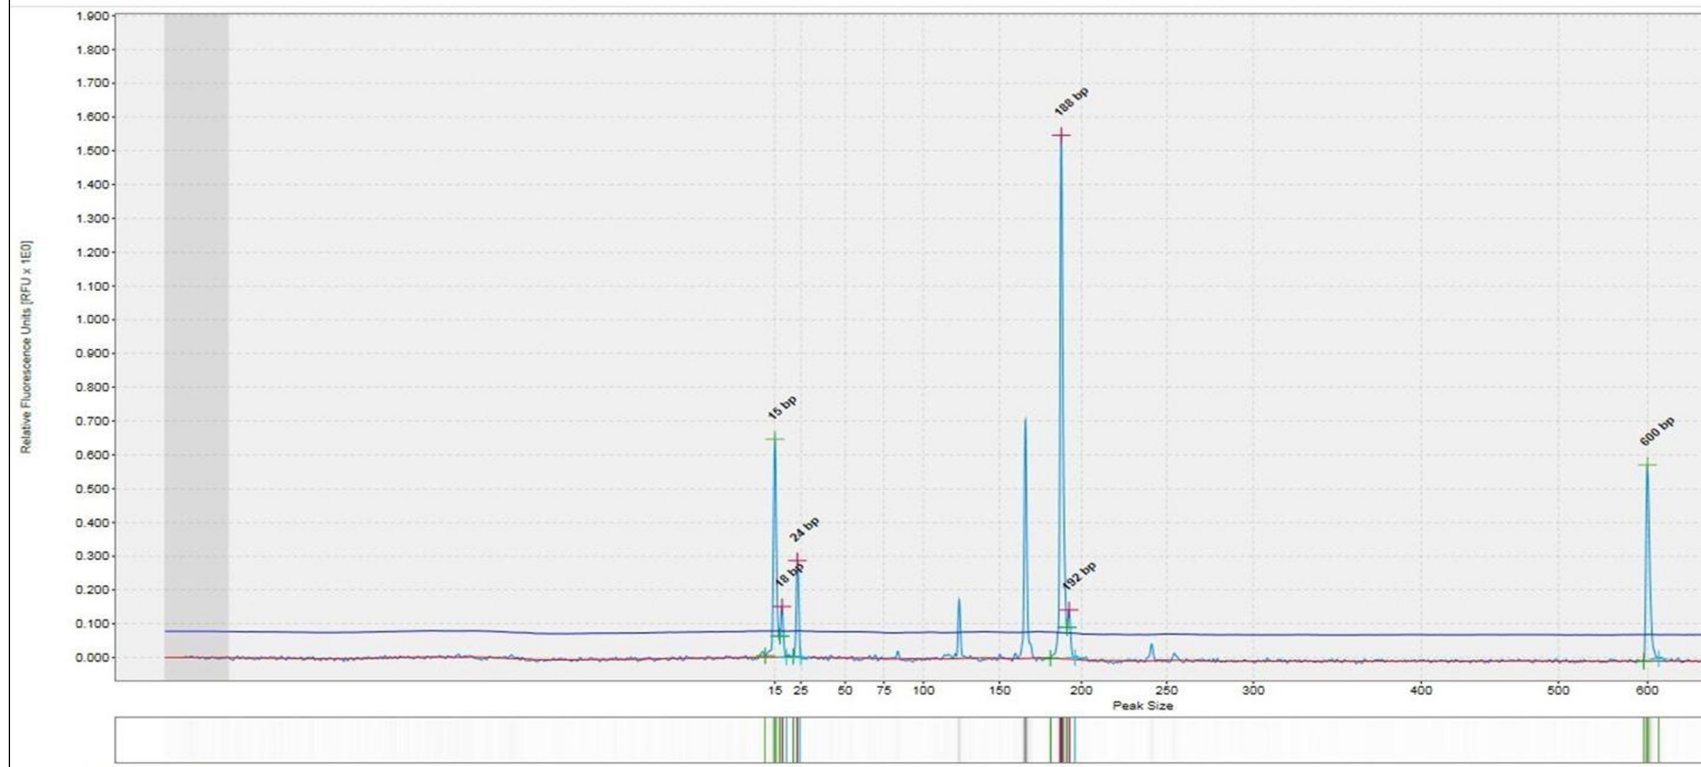

## Mu59:239bp

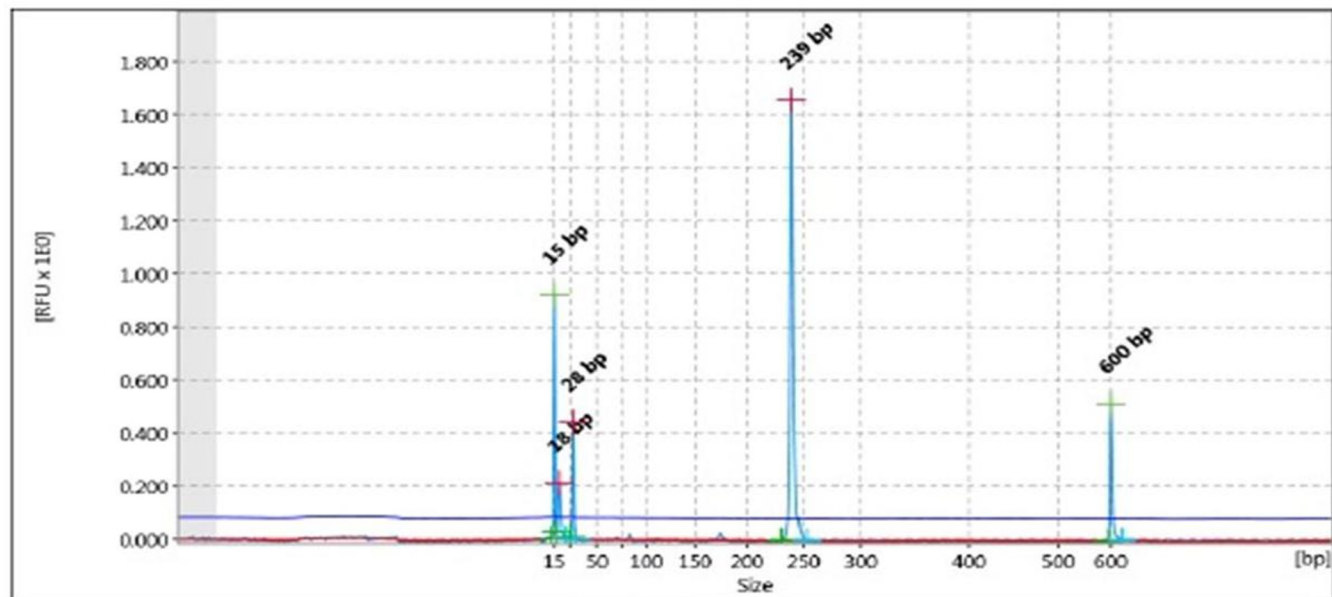

Figure: 105

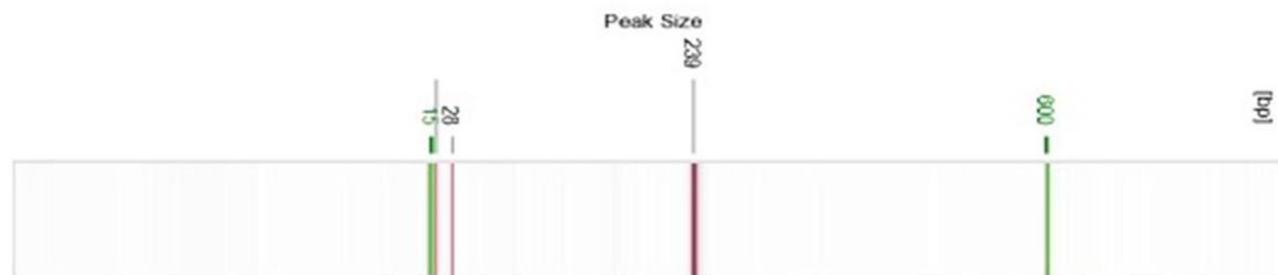

## Mu50:111bp

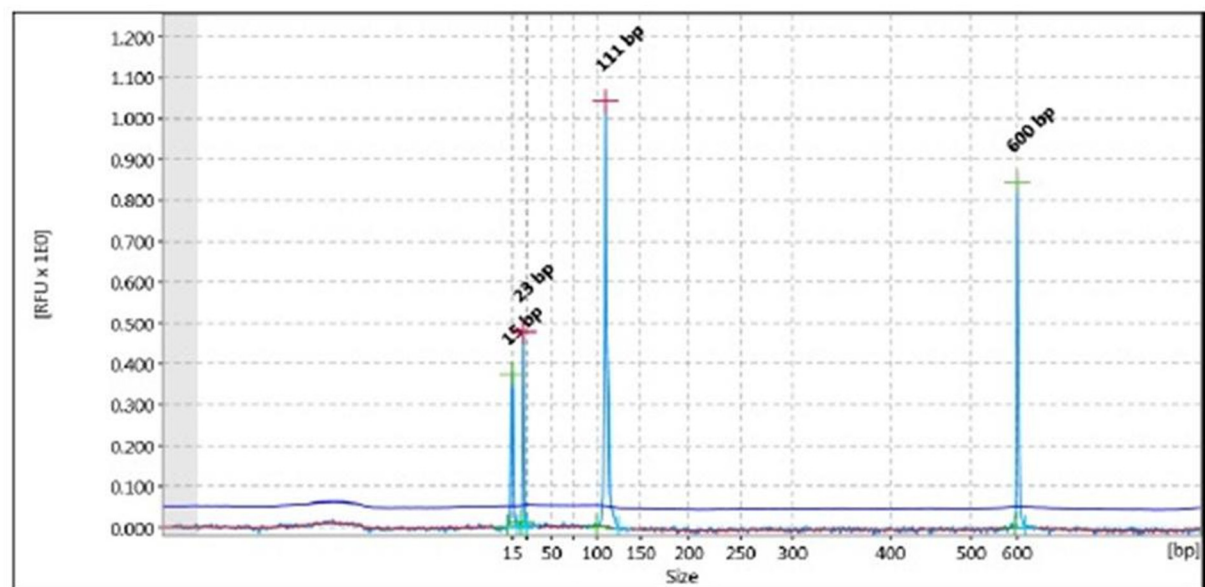

Figure: 171

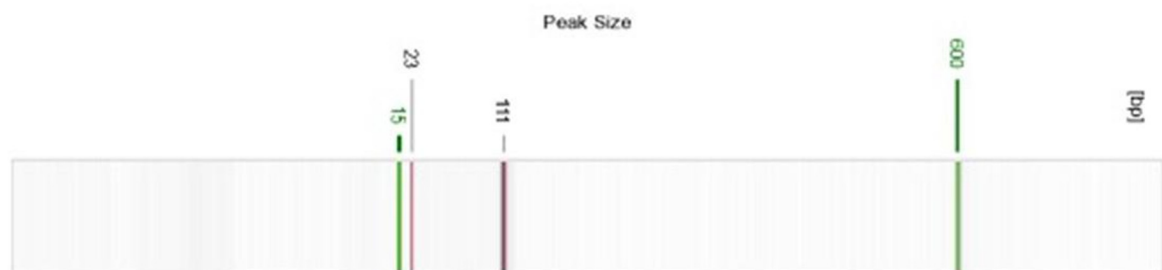

**Table S1: Complete genotype and gender of the 53 unique brown bears of Prespa NP**

| A/A | Lab code | Gender | G10H (221-257bp) |     | Mu26 (182-200bp) |     | G1D (172-184bp) |     | G10X (132-154bp) |     | G1A (180-190bp) |     | G10P (145-160bp) |     | G10C (97-126bp) |     | MU59 (219-251bp) |     | G10L (153-163bp) |     | MU50 (110-130bp) |     |
|-----|----------|--------|------------------|-----|------------------|-----|-----------------|-----|------------------|-----|-----------------|-----|------------------|-----|-----------------|-----|------------------|-----|------------------|-----|------------------|-----|
| 1   | UR25-XY  | XY     | 260              | 260 | 192              | 196 | 0               | 0   | 146              | 154 | 193             | 193 | 152              | 160 | 114             | 126 | 241              | 251 | 160              | 164 | 122              | 122 |
| 2   | UR26-XY  | XY     | 243              | 243 | 192              | 192 | 184             | 184 | 0                | 0   | 190             | 193 | 154              | 160 | 126             | 126 | 239              | 239 | 168              | 170 | 118              | 118 |
| 3   | UR27-XY  | XY     | 243              | 243 | 192              | 192 | 0               | 0   | 146              | 149 | 193             | 193 | 154              | 160 | 126             | 126 | 239              | 239 | 168              | 170 | 118              | 118 |
| 4   | UR28-XY  | XY     | 243              | 243 | 192              | 192 | 184             | 184 | 146              | 149 | 193             | 193 | 152              | 158 | 124             | 126 | 243              | 243 | 168              | 170 | 122              | 122 |
| 5   | UR29-XY  | XY     | 260              | 260 | 192              | 192 | 182             | 182 | 146              | 149 | 185             | 190 | 145              | 150 | 110             | 110 | 241              | 241 | 168              | 170 | 116              | 122 |
| 6   | UR30-XY  | XY     | 260              | 260 | 192              | 196 | 186             | 186 | 146              | 146 | 193             | 193 | 158              | 158 | 112             | 120 | 241              | 251 | 162              | 164 | 122              | 124 |
| 7   | UR32-XY  | XY     | 260              | 260 | 0                | 0   | 0               | 0   | 0                | 0   | 193             | 193 | 156              | 156 | 112             | 112 | 0                | 0   | 168              | 170 | 116              | 118 |
| 8   | UR33-XY  | XY     | 243              | 246 | 192              | 192 | 182             | 182 | 146              | 149 | 193             | 193 | 152              | 160 | 124             | 124 | 231              | 231 | 168              | 170 | 118              | 120 |
| 9   | UR198-XX | XX     | 243              | 252 | 0                | 0   | 180             | 184 | 0                | 0   | 193             | 193 | 0                | 0   | 108             | 112 | 0                | 0   | 168              | 168 | 111              | 118 |
| 10  | UR199-XY | XY     | 243              | 252 | 188              | 196 | 0               | 0   | 0                | 0   | 190             | 193 | 0                | 0   | 108             | 120 | 0                | 0   | 168              | 168 | 120              | 124 |
| 11  | UR200-XY | XY     | 0                | 0   | 200              | 200 | 186             | 186 | 0                | 0   | 190             | 193 | 156              | 160 | 110             | 120 | 239              | 251 | 160              | 164 | 120              | 128 |
| 12  | UR202-XY | XY     | 0                | 0   | 0                | 0   | 0               | 0   | 141              | 141 | 185             | 190 | 160              | 160 | 120             | 124 | 0                | 0   | 168              | 168 | 111              | 120 |
| 13  | UR204-XX | XX     | 260              | 260 | 188              | 192 | 0               | 0   | 0                | 0   | 190             | 190 | 160              | 160 | 0               | 0   | 0                | 0   | 168              | 168 | 111              | 116 |
| 14  | UR205-XX | XX     | 260              | 260 | 188              | 192 | 0               | 0   | 0                | 0   | 190             | 190 | 0                | 0   | 110             | 114 | 0                | 0   | 164              | 168 | 111              | 116 |
| 15  | UR11-XY  | XY     | 260              | 260 | 192              | 192 | 182             | 182 | 146              | 146 | 193             | 193 | 150              | 152 | 124             | 126 | 239              | 239 | 168              | 170 | 116              | 120 |
| 16  | UR12-XY  | XY     | 243              | 252 | 192              | 196 | 186             | 186 | 141              | 154 | 181             | 190 | 150              | 156 | 97              | 97  | 251              | 251 | 168              | 168 | 116              | 118 |
| 17  | UR13-XY  | XY     | 257              | 257 | 192              | 196 | 0               | 0   | 146              | 146 | 0               | 0   | 150              | 158 | 118             | 120 | 239              | 239 | 160              | 164 | 116              | 116 |
| 18  | UR14-XX  | XX     | 243              | 243 | 200              | 200 | 0               | 0   | 146              | 149 | 183             | 190 | 148              | 154 | 97              | 104 | 231              | 231 | 0                | 0   | 118              | 120 |
| 19  | UR17-XX  | XX     | 234              | 234 | 196              | 200 | 186             | 186 | 0                | 0   | 181             | 185 | 145              | 145 | 97              | 104 | 241              | 241 | 168              | 168 | 118              | 124 |
| 20  | UR18-XY  | XY     | 260              | 260 | 0                | 0   | 0               | 0   | 141              | 141 | 193             | 193 | 152              | 158 | 122             | 124 | 231              | 231 | 0                | 0   | 0                | 0   |
| 21  | UR19-XY  | XY     | 0                | 0   | 192              | 192 | 0               | 0   | 0                | 0   | 190             | 193 | 160              | 160 | 112             | 118 | 0                | 0   | 168              | 170 | 116              | 118 |
| 22  | UR20-XY  | XY     | 243              | 243 | 192              | 192 | 0               | 0   | 0                | 0   | 177             | 190 | 152              | 160 | 112             | 112 | 231              | 231 | 168              | 170 | 118              | 122 |
| 23  | UR22-XY  | XY     | 260              | 260 | 188              | 188 | 182             | 182 | 146              | 146 | 190             | 193 | 152              | 160 | 124             | 126 | 239              | 239 | 168              | 170 | 118              | 118 |
| 24  | UR24-XY  | XY     | 0                | 0   | 192              | 192 | 0               | 0   | 0                | 0   | 180             | 180 | 154              | 160 | 122             | 126 | 0                | 0   | 168              | 170 | 111              | 116 |
| 25  | UR31-XY  | XY     | 260              | 260 | 196              | 196 | 0               | 0   | 146              | 154 | 190             | 190 | 158              | 158 | 112             | 122 | 241              | 241 | 162              | 164 | 122              | 124 |
| 26  | UR182-XX | XX     | 0                | 0   | 0                | 0   | 0               | 0   | 0                | 0   | 190             | 190 | 154              | 156 | 112             | 122 | 231              | 231 | 168              | 170 | 111              | 122 |
| 27  | UR184-XX | XX     | 0                | 0   | 188              | 200 | 180             | 182 | 0                | 0   | 190             | 190 | 0                | 0   | 122             | 122 | 0                | 0   | 168              | 170 | 116              | 124 |
| 28  | UR185-XX | XX     | 260              | 260 | 0                | 0   | 186             | 186 | 0                | 0   | 0               | 0   | 160              | 160 | 108             | 108 | 0                | 0   | 168              | 170 | 116              | 118 |
| 29  | UR187-XY | XY     | 0                | 0   | 188              | 196 | 172             | 184 | 146              | 154 | 0               | 0   | 0                | 0   | 106             | 110 | 0                | 0   | 168              | 170 | 120              | 124 |
| 30  | UR188-XX | XX     | 243              | 243 | 196              | 200 | 190             | 190 | 0                | 0   | 193             | 193 | 150              | 160 | 112             | 120 | 231              | 231 | 170              | 170 | 118              | 124 |
| 31  | UR189-XX | XX     | 260              | 260 | 0                | 0   | 0               | 0   | 0                | 0   | 0               | 0   | 158              | 158 | 108             | 110 | 231              | 231 | 168              | 170 | 116              | 116 |
| 32  | UR190-XX | XX     | 257              | 257 | 0                | 0   | 0               | 0   | 0                | 0   | 190             | 193 | 140              | 140 | 106             | 126 | 0                | 0   | 168              | 170 | 111              | 116 |
| 33  | UR192-XX | XX     | 260              | 260 | 192              | 192 | 0               | 0   | 0                | 0   | 193             | 193 | 0                | 0   | 0               | 0   | 231              | 231 | 168              | 168 | 111              | 116 |
| 34  | UR194-XY | XY     | 260              | 260 | 192              | 192 | 172             | 172 | 0                | 0   | 0               | 0   | 0                | 0   | 110             | 110 | 231              | 231 | 168              | 170 | 116              | 118 |
| 35  | UR195-XY | XY     | 0                | 0   | 0                | 0   | 180             | 184 | 0                | 0   | 190             | 190 | 0                | 0   | 97              | 97  | 231              | 231 | 168              | 170 | 116              | 116 |
| 36  | UR242-XY | XY     | 243              | 243 | 188              | 188 | 0               | 0   | 146              | 146 | 190             | 193 | 158              | 160 | 122             | 122 | 239              | 239 | 168              | 170 | 118              | 122 |
| 37  | UR243-XY | XY     | 238              | 252 | 188              | 196 | 178             | 180 | 146              | 146 | 181             | 185 | 0                | 0   | 97              | 104 | 0                | 0   | 0                | 0   | 116              | 120 |
| 38  | UR244-XY | XY     | 260              | 260 | 188              | 196 | 186             | 186 | 146              | 146 | 193             | 193 | 152              | 160 | 122             | 124 | 231              | 239 | 170              | 170 | 120              | 124 |
| 39  | UR245-XY | XY     | 252              | 257 | 188              | 196 | 172             | 182 | 0                | 0   | 193             | 193 | 0                | 0   | 114             | 122 | 0                | 0   | 0                | 0   | 116              | 120 |
| 40  | UR246-XY | XY     | 252              | 252 | 188              | 192 | 182             | 184 | 136              | 146 | 0               | 0   | 0                | 0   | 100             | 108 | 0                | 0   | 168              | 168 | 116              | 120 |
| 41  | UR248-XY | XY     | 260              | 260 | 188              | 188 | 0               | 0   | 146              | 154 | 190             | 193 | 0                | 0   | 108             | 124 | 239              | 239 | 168              | 170 | 116              | 122 |
| 42  | UR252-XY | XY     | 243              | 252 | 188              | 192 | 182             | 182 | 146              | 146 | 190             | 193 | 160              | 160 | 122             | 126 | 0                | 0   | 0                | 0   | 122              | 128 |
| 43  | UR253-XY | XY     | 260              | 260 | 188              | 200 | 184             | 184 | 146              | 146 | 190             | 193 | 156              | 158 | 112             | 120 | 241              | 243 | 170              | 170 | 122              | 128 |
| 44  | UR258-XY | XY     | 243              | 252 | 188              | 196 | 186             | 186 | 146              | 146 | 190             | 193 | 150              | 150 | 108             | 118 | 0                | 0   | 162              | 164 | 116              | 124 |
| 45  | UR259-XY | XY     | 243              | 243 | 0                | 0   | 180             | 184 | 0                | 0   | 0               | 0   | 0                | 0   | 112             | 112 | 231              | 231 | 168              | 168 | 116              | 118 |
| 46  | UR260-XY | XY     | 0                | 0   | 188              | 192 | 180             | 184 | 146              | 154 | 193             | 193 | 158              | 160 | 122             | 124 | 239              | 239 | 160              | 162 | 116              | 124 |
| 47  | UR262-XY | XY     | 234              | 257 | 188              | 192 | 180             | 184 | 146              | 154 | 193             | 193 | 0                | 0   | 122             | 124 | 239              | 239 | 160              | 162 | 118              | 124 |
| 48  | UR263-XX | XX     | 0                | 0   | 192              | 192 | 178             | 180 | 0                | 0   | 185             | 193 | 0                | 0   | 124             | 124 | 231              | 231 | 168              | 168 | 116              | 120 |
| 49  | UR264-XX | XX     | 238              | 248 | 192              | 200 | 184             | 184 | 146              | 154 | 190             | 193 | 160              | 160 | 118             | 122 | 231              | 231 | 170              | 170 | 120              | 122 |
| 50  | UR268-XX | XX     | 238              | 248 | 188              | 196 | 184             | 184 | 146              | 154 | 177             | 190 | 160              | 160 | 118             | 122 | 231              | 231 | 0                | 0   | 122              | 124 |
| 51  | UR270-XY | XY     | 0                | 0   | 188              | 192 | 0               | 0   | 146              | 146 | 190             | 193 | 0                | 0   | 112             | 112 | 0                | 0   | 168              | 170 | 116              | 118 |
| 52  | UR271-XY | XY     | 238              | 257 | 188              | 192 | 180             | 184 | 146              | 154 | 190             | 193 | 154              | 160 | 112             | 118 | 231              | 231 | 168              | 170 | 116              | 122 |
| 53  | UR273-XY | XY     | 238              | 257 | 188              | 192 | 180             | 184 | 146              | 154 | 190             | 193 | 156              | 160 | 112             | 118 | 0                | 0   | 168              | 170 | 116              | 122 |

**Table S2: Complete genotype and gender of the 65 unique brown bears of Pindos NP.**

| A/A | Lab code | Gender | G10H (221-257bp) |     | Mu26 (182-200bp) |     | G1D (172-184bp) |     | G10X (132-154bp) |     | G1A (180-190bp) |     | G10P (145-160bp) |     | G10C (97-126bp) |     | MU59 (219-251bp) |     | G10L (153-163bp) |     | MU50 (110-130bp) |     |
|-----|----------|--------|------------------|-----|------------------|-----|-----------------|-----|------------------|-----|-----------------|-----|------------------|-----|-----------------|-----|------------------|-----|------------------|-----|------------------|-----|
| 1   | UR315-XY | XY     | 243              | 252 | 192              | 196 | 178             | 180 | 146              | 154 | 190             | 193 | 160              | 160 | 97              | 118 | 239              | 239 | 168              | 170 | 111              | 111 |
| 2   | UR317-XX | XX     | 243              | 248 | 192              | 196 | 180             | 182 | 146              | 149 | 190             | 193 | 160              | 160 | 97              | 118 | 0                | 0   | 168              | 170 | 109              | 116 |
| 3   | UR319-XX | XX     | 0                | 0   | 0                | 0   | 184             | 184 | 0                | 0   | 190             | 193 | 0                | 0   | 97              | 118 | 231              | 231 | 168              | 170 | 109              | 116 |
| 4   | UR320-XY | XY     | 243              | 252 | 196              | 200 | 180             | 182 | 146              | 146 | 185             | 190 | 0                | 0   | 108             | 118 | 251              | 251 | 164              | 168 | 105              | 107 |
| 5   | UR322-XY | XY     | 234              | 238 | 188              | 192 | 184             | 184 | 0                | 0   | 181             | 181 | 0                | 0   | 112             | 122 | 0                | 0   | 168              | 168 | 107              | 111 |
| 6   | UR323-XY | XY     | 234              | 238 | 188              | 192 | 184             | 184 | 146              | 146 | 0               | 0   | 160              | 160 | 112             | 122 | 241              | 251 | 160              | 162 | 107              | 111 |
| 7   | UR324-XX | XX     | 0                | 0   | 196              | 200 | 180             | 184 | 0                | 0   | 190             | 193 | 0                | 0   | 0               | 0   | 251              | 251 | 160              | 160 | 107              | 109 |
| 8   | UR328-XY | XY     | 234              | 257 | 192              | 200 | 0               | 0   | 146              | 146 | 0               | 0   | 160              | 160 | 112             | 120 | 239              | 251 | 156              | 160 | 107              | 109 |
| 9   | UR329-XX | XX     | 0                | 0   | 192              | 192 | 184             | 184 | 0                | 0   | 190             | 193 | 156              | 160 | 126             | 126 | 0                | 0   | 168              | 168 | 0                | 0   |
| 10  | UR331-XX | XX     | 260              | 260 | 192              | 192 | 182             | 184 | 0                | 0   | 0               | 0   | 160              | 160 | 112             | 120 | 0                | 0   | 0                | 0   | 107              | 111 |
| 11  | UR332-XX | XX     | 238              | 257 | 192              | 196 | 184             | 184 | 146              | 146 | 193             | 193 | 160              | 160 | 122             | 124 | 239              | 239 | 170              | 170 | 109              | 120 |
| 12  | UR334-XX | XX     | 260              | 260 | 192              | 196 | 0               | 0   | 146              | 146 | 190             | 190 | 150              | 160 | 120             | 124 | 231              | 239 | 170              | 170 | 109              | 111 |
| 13  | UR335-XY | XY     | 243              | 252 | 192              | 196 | 0               | 0   | 146              | 149 | 190             | 193 | 150              | 156 | 120             | 122 | 239              | 239 | 170              | 170 | 109              | 116 |
| 14  | UR341-XY | XY     | 234              | 248 | 192              | 192 | 0               | 0   | 146              | 146 | 0               | 0   | 156              | 160 | 97              | 120 | 0                | 0   | 0                | 0   | 105              | 107 |
| 15  | UR344-XY | XY     | 234              | 243 | 192              | 192 | 0               | 0   | 146              | 154 | 190             | 193 | 160              | 160 | 112             | 122 | 231              | 239 | 160              | 170 | 111              | 120 |
| 16  | UR347-XY | XY     | 224              | 224 | 192              | 192 | 182             | 182 | 146              | 154 | 193             | 193 | 152              | 160 | 97              | 118 | 239              | 239 | 170              | 170 | 111              | 111 |
| 17  | UR349-XY | XY     | 234              | 258 | 192              | 196 | 184             | 184 | 146              | 146 | 190             | 193 | 150              | 156 | 120             | 122 | 239              | 241 | 168              | 170 | 107              | 118 |
| 18  | UR352-XX | XX     | 0                | 0   | 0                | 0   | 184             | 184 | 146              | 146 | 185             | 190 | 0                | 0   | 106             | 106 | 224              | 224 | 168              | 170 | 120              | 120 |
| 19  | UR353-XY | XY     | 260              | 260 | 0                | 0   | 180             | 182 | 146              | 154 | 193             | 193 | 150              | 156 | 120             | 122 | 239              | 239 | 168              | 170 | 111              | 116 |
| 20  | UR355-XX | XX     | 260              | 260 | 0                | 0   | 0               | 0   | 0                | 0   | 193             | 193 | 160              | 160 | 97              | 112 | 0                | 0   | 168              | 170 | 109              | 118 |
| 21  | UR357-XY | XY     | 243              | 252 | 192              | 196 | 0               | 0   | 146              | 146 | 181             | 190 | 150              | 156 | 120             | 124 | 239              | 239 | 170              | 170 | 111              | 118 |
| 22  | UR358-XY | XY     | 243              | 260 | 192              | 196 | 0               | 0   | 146              | 146 | 190             | 193 | 156              | 160 | 97              | 118 | 0                | 0   | 170              | 170 | 107              | 116 |
| 23  | UR359-XY | XY     | 243              | 252 | 192              | 196 | 0               | 0   | 146              | 154 | 193             | 193 | 160              | 160 | 97              | 120 | 239              | 251 | 170              | 170 | 109              | 111 |
| 24  | UR360-XY | XY     | 243              | 252 | 192              | 196 | 0               | 0   | 146              | 154 | 193             | 193 | 160              | 160 | 120             | 124 | 239              | 251 | 168              | 170 | 107              | 111 |
| 25  | UR361-XY | XY     | 234              | 248 | 196              | 196 | 0               | 0   | 146              | 146 | 190             | 190 | 152              | 160 | 118             | 126 | 0                | 0   | 160              | 160 | 109              | 111 |
| 26  | UR362-XY | XY     | 243              | 243 | 192              | 196 | 184             | 184 | 146              | 154 | 190             | 193 | 160              | 160 | 97              | 118 | 0                | 0   | 168              | 168 | 111              | 116 |
| 27  | UR363-XY | XY     | 260              | 260 | 192              | 196 | 0               | 0   | 146              | 146 | 185             | 190 | 160              | 160 | 97              | 122 | 227              | 231 | 168              | 170 | 107              | 109 |
| 28  | UR365-XY | XY     | 234              | 257 | 192              | 196 | 184             | 186 | 146              | 154 | 190             | 193 | 160              | 160 | 120             | 124 | 231              | 239 | 168              | 170 | 107              | 111 |
| 29  | UR366-XY | XY     | 234              | 257 | 192              | 196 | 186             | 186 | 146              | 154 | 193             | 193 | 160              | 160 | 97              | 118 | 231              | 241 | 170              | 170 | 111              | 120 |
| 30  | UR367-XY | XY     | 226              | 234 | 192              | 196 | 0               | 0   | 146              | 154 | 190             | 193 | 160              | 160 | 97              | 122 | 231              | 241 | 168              | 168 | 109              | 116 |
| 31  | UR370-XY | XY     | 260              | 260 | 200              | 200 | 0               | 0   | 146              | 154 | 190             | 193 | 160              | 160 | 118             | 122 | 251              | 251 | 168              | 170 | 111              | 116 |
| 32  | UR371-XY | XY     | 260              | 260 | 200              | 200 | 0               | 0   | 146              | 154 | 193             | 193 | 160              | 160 | 118             | 122 | 251              | 251 | 168              | 170 | 111              | 116 |
| 33  | UR372-XY | XY     | 260              | 260 | 192              | 196 | 0               | 0   | 146              | 154 | 190             | 193 | 160              | 160 | 122             | 124 | 0                | 0   | 170              | 170 | 109              | 111 |
| 34  | UR373-XX | XX     | 234              | 243 | 0                | 0   | 0               | 0   | 146              | 146 | 190             | 193 | 150              | 152 | 97              | 126 | 0                | 0   | 0                | 0   | 109              | 111 |
| 35  | UR374-XY | XY     | 243              | 252 | 192              | 196 | 0               | 0   | 146              | 154 | 193             | 193 | 160              | 160 | 97              | 124 | 239              | 239 | 170              | 170 | 111              | 111 |
| 36  | UR378-XY | XY     | 0                | 0   | 192              | 192 | 0               | 0   | 146              | 146 | 193             | 193 | 0                | 0   | 120             | 124 | 0                | 0   | 164              | 168 | 109              | 116 |
| 37  | UR379-XY | XY     | 243              | 252 | 192              | 196 | 184             | 184 | 146              | 146 | 185             | 190 | 160              | 160 | 120             | 122 | 239              | 251 | 162              | 162 | 109              | 111 |
| 38  | UR380-XX | XX     | 260              | 260 | 192              | 192 | 182             | 184 | 154              | 154 | 185             | 190 | 0                | 0   | 97              | 112 | 0                | 0   | 168              | 170 | 107              | 118 |
| 39  | UR381-XY | XY     | 243              | 252 | 0                | 0   | 0               | 0   | 146              | 154 | 190             | 193 | 0                | 0   | 118             | 122 | 0                | 0   | 156              | 160 | 111              | 116 |
| 40  | UR382-XY | XY     | 234              | 252 | 192              | 196 | 0               | 0   | 146              | 154 | 190             | 193 | 0                | 0   | 118             | 122 | 239              | 239 | 156              | 160 | 111              | 116 |
| 41  | UR383-XY | XY     | 234              | 243 | 188              | 192 | 0               | 0   | 146              | 154 | 193             | 193 | 160              | 160 | 97              | 122 | 231              | 239 | 160              | 160 | 111              | 122 |
| 42  | UR385-XY | XY     | 0                | 0   | 0                | 0   | 0               | 0   | 146              | 146 | 193             | 193 | 160              | 160 | 120             | 120 | 0                | 0   | 168              | 168 | 107              | 109 |
| 43  | UR392-XY | XY     | 243              | 252 | 0                | 0   | 0               | 0   | 146              | 146 | 185             | 190 | 160              | 160 | 122             | 124 | 0                | 0   | 168              | 170 | 109              | 111 |
| 44  | UR393-XX | XX     | 243              | 252 | 0                | 0   | 0               | 0   | 146              | 146 | 0               | 0   | 160              | 160 | 124             | 124 | 239              | 239 | 168              | 170 | 109              | 111 |
| 45  | UR394-XY | XY     | 234              | 243 | 192              | 192 | 0               | 0   | 146              | 146 | 190             | 193 | 160              | 160 | 97              | 118 | 231              | 239 | 170              | 170 | 107              | 107 |
| 46  | UR395-XY | XY     | 234              | 257 | 192              | 196 | 0               | 0   | 146              | 146 | 190             | 193 | 150              | 160 | 120             | 122 | 231              | 239 | 168              | 170 | 109              | 111 |
| 47  | UR396-XX | XX     | 260              | 260 | 0                | 0   | 0               | 0   | 146              | 146 | 0               | 0   | 160              | 160 | 118             | 120 | 0                | 0   | 168              | 170 | 111              | 122 |
| 48  | UR397-XX | XX     | 238              | 238 | 0                | 0   | 184             | 184 | 146              | 146 | 0               | 0   | 0                | 0   | 97              | 118 | 0                | 0   | 170              | 170 | 109              | 111 |
| 49  | UR398-XY | XY     | 243              | 243 | 192              | 196 | 0               | 0   | 146              | 146 | 190             | 193 | 148              | 150 | 108             | 122 | 0                | 0   | 170              | 170 | 111              | 118 |
| 50  | UR399-XX | XX     | 0                | 0   | 192              | 192 | 0               | 0   | 0                | 0   | 193             | 193 | 0                | 0   | 100             | 124 | 231              | 231 | 168              | 170 | 109              | 118 |
| 51  | UR400-XX | XX     | 0                | 0   | 188              | 192 | 182             | 184 | 0                | 0   | 0               | 0   | 156              | 160 | 97              | 110 | 231              | 231 | 0                | 0   | 109              | 111 |
| 52  | UR402-XX | XX     | 0                | 0   | 192              | 192 | 0               | 0   | 0                | 0   | 190             | 190 | 160              | 160 | 124             | 124 | 0                | 0   | 164              | 168 | 118              | 128 |
| 53  | UR405-XY | XY     | 224              | 224 | 192              | 196 | 0               | 0   | 146              | 154 | 190             | 193 | 150              | 150 | 97              | 112 | 0                | 0   | 0                | 0   | 111              | 116 |
| 54  | UR406-XX | XX     | 0                | 0   | 192              | 196 | 184             | 184 | 146              | 154 | 193             | 193 | 0                | 0   | 0               | 0   | 239              | 239 | 0                | 0   | 107              | 107 |
| 55  | UR409-XY | XY     | 260              | 260 | 192              | 196 | 184             | 184 | 146              | 154 | 0               | 0   | 0                | 0   | 97              | 110 | 0                | 0   | 0                | 0   | 107              | 111 |
| 56  | UR412-XX | XX     | 0                | 0   | 192              | 196 | 0               | 0   | 141              | 146 | 183             | 190 | 160              | 160 | 97              | 110 | 243              | 243 | 0                | 0   | 107              | 109 |
| 57  | UR414-XY | XY     | 234              | 248 | 192              | 196 | 0               | 0   | 146              | 146 | 193             | 193 | 160              | 160 | 120             | 124 | 239              | 239 | 170              | 170 | 111              | 120 |
| 58  | UR416-XY | XY     | 234              | 243 | 192              | 200 | 0               | 0   | 146              | 146 | 190             | 193 | 160              | 160 | 120             | 124 | 241              | 241 | 168              | 170 | 111              | 118 |
| 59  | UR418-XY | XY     | 234              | 234 | 188              | 196 | 0               | 0   | 146              | 146 | 190             | 193 | 160              | 160 | 97              | 124 | 231              | 239 | 168              | 170 | 109              | 118 |
| 60  |          |        |                  |     |                  |     |                 |     |                  |     |                 |     |                  |     |                 |     |                  |     |                  |     |                  |     |

**Table S3: Complex genotype and gender of the 77 unique brown bears of Rhodopi NP.**

| A/A | Lab code | Gender | G10H (221-257bp) |     | Mu26 (182-200bp) |     | G1D (172-184bp) |     | G10X (132-154bp) |     | G1A (180-190bp) |     | G10P (145-160bp) |     | G10C (97-126bp) |     | MU59 (219-251bp) |     | G10L (153-163bp) |     | MU50 (110-130bp) |     |
|-----|----------|--------|------------------|-----|------------------|-----|-----------------|-----|------------------|-----|-----------------|-----|------------------|-----|-----------------|-----|------------------|-----|------------------|-----|------------------|-----|
| 1   | UR57-XY  | XY     | 257              | 257 | 200              | 200 | 184             | 184 | 0                | 0   | 193             | 193 | 156              | 156 | 108             | 126 | 231              | 239 | 168              | 170 | 122              | 128 |
| 2   | UR97-XY  | XY     | 257              | 257 | 192              | 196 | 182             | 184 | 0                | 0   | 193             | 193 | 150              | 156 | 118             | 120 | 231              | 251 | 168              | 170 | 118              | 118 |
| 3   | UR101-XX | XX     | 257              | 257 | 0                | 0   | 0               | 0   | 0                | 0   | 177             | 177 | 150              | 156 | 120             | 120 | 231              | 231 | 170              | 170 | 116              | 118 |
| 4   | UR219-XY | XY     | 257              | 257 | 188              | 188 | 174             | 178 | 146              | 146 | 190             | 190 | 156              | 158 | 110             | 120 | 0                | 0   | 168              | 170 | 116              | 118 |
| 5   | UR230-XY | XY     | 257              | 257 | 188              | 188 | 0               | 0   | 146              | 154 | 193             | 193 | 156              | 160 | 110             | 118 | 231              | 239 | 168              | 170 | 120              | 120 |
| 6   | UR102-XY | XY     | 257              | 257 | 188              | 188 | 184             | 184 | 0                | 0   | 177             | 190 | 158              | 160 | 112             | 122 | 231              | 239 | 168              | 170 | 118              | 122 |
| 7   | UR104-XY | XY     | 257              | 257 | 196              | 200 | 184             | 184 | 0                | 0   | 185             | 190 | 145              | 145 | 97              | 106 | 239              | 251 | 168              | 170 | 118              | 122 |
| 8   | UR134-XY | XY     | 257              | 257 | 192              | 200 | 184             | 184 | 0                | 0   | 181             | 183 | 145              | 145 | 97              | 108 | 224              | 239 | 168              | 168 | 111              | 111 |
| 9   | UR136-XY | XY     | 257              | 257 | 188              | 196 | 180             | 180 | 154              | 154 | 190             | 190 | 156              | 160 | 122             | 124 | 231              | 231 | 168              | 170 | 116              | 116 |
| 10  | UR137-XY | XY     | 257              | 257 | 192              | 196 | 180             | 180 | 154              | 154 | 190             | 190 | 145              | 160 | 122             | 124 | 231              | 243 | 168              | 170 | 116              | 116 |
| 11  | UR301-XY | XY     | 257              | 257 | 192              | 192 | 184             | 184 | 146              | 154 | 0               | 0   | 0                | 0   | 0               | 0   | 0                | 0   | 168              | 168 | 116              | 120 |
| 12  | UR306-XY | XY     | 260              | 260 | 200              | 200 | 184             | 184 | 0                | 0   | 0               | 0   | 0                | 0   | 97              | 97  | 0                | 0   | 168              | 168 | 116              | 120 |
| 13  | UR311-XY | XY     | 257              | 257 | 184              | 200 | 184             | 184 | 141              | 154 | 190             | 193 | 156              | 160 | 110             | 122 | 239              | 239 | 168              | 168 | 116              | 118 |
| 14  | UR82-XY  | XY     | 221              | 221 | 192              | 200 | 0               | 0   | 0                | 0   | 185             | 190 | 145              | 145 | 97              | 110 | 239              | 251 | 168              | 170 | 118              | 122 |
| 15  | UR91-XY  | XY     | 221              | 221 | 192              | 200 | 0               | 0   | 0                | 0   | 193             | 193 | 150              | 158 | 108             | 122 | 239              | 251 | 168              | 170 | 118              | 122 |
| 16  | UR65-XY  | XY     | 221              | 221 | 192              | 200 | 184             | 184 | 0                | 0   | 183             | 185 | 146              | 146 | 97              | 102 | 227              | 231 | 168              | 170 | 120              | 122 |
| 17  | UR133-XY | XY     | 221              | 221 | 192              | 196 | 184             | 184 | 0                | 0   | 0               | 0   | 145              | 145 | 112             | 114 | 0                | 0   | 168              | 170 | 118              | 120 |
| 18  | UR74-XY  | XY     | 243              | 243 | 192              | 196 | 184             | 184 | 0                | 0   | 185             | 190 | 144              | 146 | 97              | 108 | 239              | 251 | 168              | 170 | 118              | 118 |
| 19  | UR281-XY | XY     | 232              | 243 | 192              | 200 | 0               | 0   | 0                | 0   | 0               | 0   | 0                | 0   | 97              | 97  | 231              | 231 | 0                | 0   | 116              | 120 |
| 20  | UR63-XY  | XY     | 243              | 243 | 192              | 192 | 184             | 184 | 146              | 146 | 181             | 183 | 156              | 158 | 108             | 108 | 231              | 231 | 168              | 168 | 118              | 118 |
| 21  | UR73-XY  | XY     | 234              | 234 | 192              | 192 | 182             | 182 | 0                | 0   | 177             | 193 | 160              | 160 | 112             | 126 | 239              | 239 | 168              | 170 | 116              | 118 |
| 22  | UR76-XY  | XY     | 0                | 0   | 188              | 192 | 0               | 0   | 0                | 0   | 183             | 185 | 148              | 150 | 97              | 108 | 231              | 239 | 168              | 170 | 116              | 118 |
| 23  | UR92-XY  | XY     | 234              | 234 | 192              | 196 | 182             | 184 | 0                | 0   | 177             | 193 | 158              | 160 | 124             | 126 | 233              | 239 | 168              | 170 | 116              | 118 |
| 24  | UR222-XY | XY     | 234              | 243 | 192              | 192 | 180             | 180 | 146              | 146 | 193             | 193 | 145              | 154 | 108             | 118 | 0                | 0   | 168              | 170 | 116              | 118 |
| 25  | UR224-XY | XY     | 234              | 252 | 188              | 192 | 184             | 184 | 146              | 154 | 193             | 193 | 158              | 160 | 122             | 126 | 231              | 231 | 168              | 170 | 116              | 118 |
| 26  | UR105-XY | XY     | 234              | 234 | 192              | 192 | 182             | 182 | 0                | 0   | 193             | 193 | 158              | 160 | 124             | 126 | 239              | 239 | 168              | 170 | 116              | 118 |
| 27  | UR130-XY | XY     | 234              | 234 | 192              | 192 | 0               | 0   | 0                | 0   | 193             | 193 | 156              | 160 | 112             | 122 | 0                | 0   | 168              | 168 | 116              | 118 |
| 28  | UR59-XY  | XY     | 234              | 243 | 190              | 192 | 182             | 182 | 146              | 146 | 177             | 190 | 160              | 160 | 126             | 126 | 241              | 241 | 0                | 0   | 116              | 118 |
| 29  | UR60-XY  | XY     | 236              | 266 | 192              | 196 | 184             | 184 | 146              | 146 | 193             | 193 | 156              | 160 | 114             | 120 | 239              | 239 | 168              | 170 | 116              | 120 |
| 30  | UR278-XY | XY     | 234              | 252 | 188              | 192 | 184             | 184 | 146              | 149 | 0               | 0   | 0                | 0   | 112             | 112 | 0                | 0   | 168              | 170 | 116              | 118 |
| 31  | UR79-XY  | XY     | 243              | 243 | 192              | 192 | 182             | 182 | 0                | 0   | 177             | 190 | 160              | 160 | 112             | 112 | 227              | 227 | 168              | 170 | 111              | 116 |
| 32  | UR124-XY | XY     | 243              | 243 | 188              | 200 | 0               | 0   | 0                | 0   | 181             | 185 | 148              | 150 | 97              | 97  | 227              | 227 | 168              | 170 | 116              | 118 |
| 33  | UR126-XY | XY     | 243              | 257 | 188              | 200 | 182             | 182 | 0                | 0   | 181             | 185 | 148              | 150 | 97              | 97  | 231              | 239 | 168              | 170 | 118              | 122 |
| 34  | UR305-XY | XY     | 238              | 257 | 188              | 196 | 184             | 184 | 154              | 154 | 193             | 193 | 0                | 0   | 124             | 126 | 231              | 239 | 162              | 164 | 118              | 128 |
| 35  | UR218-XY | XY     | 238              | 252 | 182              | 188 | 180             | 184 | 146              | 154 | 0               | 0   | 156              | 158 | 110             | 120 | 0                | 0   | 168              | 170 | 118              | 120 |
| 36  | UR110-XY | XY     | 238              | 238 | 192              | 192 | 182             | 182 | 146              | 146 | 183             | 190 | 160              | 160 | 126             | 126 | 239              | 239 | 168              | 170 | 116              | 118 |
| 37  | UR274-XY | XY     | 238              | 243 | 188              | 192 | 184             | 184 | 146              | 154 | 190             | 193 | 156              | 160 | 112             | 122 | 231              | 231 | 168              | 170 | 103              | 116 |
| 38  | UR106-XY | XY     | 248              | 257 | 192              | 196 | 184             | 184 | 0                | 0   | 177             | 177 | 158              | 160 | 108             | 124 | 0                | 0   | 170              | 170 | 118              | 120 |
| 39  | UR120-XY | XY     | 238              | 260 | 196              | 200 | 186             | 186 | 0                | 0   | 181             | 185 | 146              | 150 | 97              | 97  | 239              | 251 | 168              | 170 | 118              | 124 |
| 40  | UR283-XY | XY     | 248              | 252 | 188              | 192 | 186             | 186 | 146              | 149 | 0               | 0   | 0                | 0   | 0               | 0   | 0                | 0   | 168              | 170 | 118              | 124 |
| 41  | UR289-XY | XY     | 248              | 257 | 192              | 192 | 186             | 186 | 0                | 0   | 0               | 0   | 0                | 0   | 0               | 0   | 231              | 231 | 168              | 170 | 111              | 116 |
| 42  | UR299-XY | XY     | 226              | 232 | 188              | 196 | 184             | 184 | 0                | 0   | 190             | 193 | 158              | 160 | 97              | 110 | 0                | 0   | 168              | 168 | 116              | 118 |
| 43  | UR95-XY  | XY     | 252              | 257 | 188              | 192 | 184             | 184 | 0                | 0   | 193             | 193 | 160              | 160 | 120             | 126 | 239              | 239 | 168              | 170 | 116              | 118 |
| 44  | UR107-XY | XY     | 252              | 257 | 192              | 196 | 184             | 184 | 0                | 0   | 177             | 177 | 160              | 160 | 106             | 122 | 239              | 239 | 168              | 170 | 116              | 118 |
| 45  | UR303-XY | XY     | 252              | 252 | 188              | 192 | 184             | 184 | 146              | 146 | 181             | 190 | 148              | 156 | 106             | 108 | 231              | 231 | 168              | 170 | 118              | 120 |
| 46  | UR69-XY  | XY     | 0                | 0   | 200              | 200 | 184             | 184 | 146              | 146 | 177             | 190 | 160              | 160 | 126             | 126 | 231              | 231 | 168              | 170 | 118              | 128 |
| 47  | UR80-XY  | XY     | 252              | 252 | 188              | 188 | 182             | 182 | 0                | 0   | 177             | 193 | 156              | 158 | 126             | 126 | 231              | 231 | 168              | 170 | 118              | 124 |
| 48  | UR66-XY  | XY     | 0                | 0   | 188              | 192 | 182             | 184 | 146              | 146 | 177             | 190 | 158              | 158 | 124             | 126 | 231              | 231 | 168              | 170 | 118              | 128 |
| 49  | UR216-XY | XY     | 0                | 0   | 200              | 200 | 172             | 174 | 149              | 154 | 193             | 193 | 148              | 152 | 108             | 120 | 0                | 0   | 168              | 170 | 111              | 116 |
| 50  | UR78-XX  | XX     | 0                | 0   | 192              | 192 | 0               | 0   | 0                | 0   | 0               | 0   | 150              | 150 | 110             | 126 | 231              | 231 | 168              | 168 | 111              | 116 |
| 51  | UR89-XX  | XX     | 0                | 0   | 196              | 196 | 0               | 0   | 0                | 0   | 190             | 193 | 152              | 156 | 112             | 120 | 239              | 239 | 152              | 152 | 116              | 118 |
| 52  | UR240-XX | XX     | 0                | 0   | 196              | 200 | 178             | 180 | 0                | 0   | 0               | 0   | 0                | 0   | 112             | 118 | 231              | 231 | 168              | 168 | 116              | 116 |
| 53  | UR313-XY | XY     | 0                | 0   | 184              | 184 | 184             | 184 | 146              | 154 | 177             | 190 | 158              | 160 | 124             | 126 | 231              | 231 | 168              | 170 | 116              | 128 |
| 54  | UR209-XY | XY     | 0                | 0   | 192              | 192 | 0               | 0   | 0                | 0   | 190             | 190 | 0                | 0   | 108             | 108 | 231              | 231 | 168              | 168 | 116              | 116 |
| 55  | UR210-XY | XY     | 0                | 0   | 188              | 188 | 184             | 184 | 146              | 146 | 190             | 193 | 148              | 152 | 110             | 124 | 231              | 231 | 168              | 168 | 116              | 116 |
| 56  | UR284-XX | XX     | 0                | 0   | 192              | 192 | 0               | 0   | 0                | 0   | 190             | 193 | 0                | 0   | 110             | 110 | 231              | 231 | 168              | 168 | 118              | 120 |
| 57  | UR286-XY | XY     | 0                | 0   | 200              | 200 | 0               | 0   | 0                | 0   | 183             | 183 | 0                | 0   | 106             | 106 | 231              | 231 | 168              | 168 | 111              | 118 |
| 58  | UR295-XY | XY     | 0                | 0   | 188              | 192 | 184             | 184 | 154              | 154 | 190             | 190 | 0                | 0   | 0               | 0   | 0                | 0   | 168              | 168 | 116              | 120 |
| 59  | UR139-XX | XX     | 0                | 0   | 0                | 0   | 178             | 178 | 0                | 0   | 185             | 190 | 0                | 0   | 112             | 118 | 231              | 231 | 168              | 168 | 118              | 122 |
| 60  | UR234-XY | XY     | 0                | 0   | 192              | 200 | 186             | 186 | 146              | 154 | 185             | 190 | 145              | 145 | 97              | 110 | 0                | 0   | 168              | 170 | 118              | 122 |

**Table S4: Complex genotype and gender of the 77 unique brown bears of Rhodopi NP  
(n=61-77).**

|    |          |    |     |     |     |     |     |     |     |     |     |     |     |     |     |     |     |     |     |     |     |     |
|----|----------|----|-----|-----|-----|-----|-----|-----|-----|-----|-----|-----|-----|-----|-----|-----|-----|-----|-----|-----|-----|-----|
| 61 | UR239-XX | XX | 260 | 260 | 0   | 0   | 0   | 0   | 0   | 0   | 0   | 0   | 158 | 158 | 100 | 118 | 231 | 231 | 168 | 170 | 118 | 120 |
| 62 | UR114-XX | XX | 260 | 260 | 192 | 200 | 184 | 184 | 0   | 0   | 185 | 190 | 160 | 160 | 112 | 112 | 239 | 243 | 168 | 170 | 116 | 120 |
| 63 | UR116-XY | XY | 260 | 260 | 188 | 192 | 186 | 186 | 0   | 0   | 181 | 185 | 146 | 150 | 110 | 112 | 231 | 231 | 168 | 170 | 118 | 128 |
| 64 | UR109-XY | XY | 260 | 260 | 200 | 200 | 184 | 184 | 0   | 0   | 177 | 190 | 156 | 160 | 122 | 126 | 231 | 251 | 160 | 168 | 116 | 124 |
| 65 | UR276-XX | XX | 260 | 260 | 184 | 192 | 0   | 0   | 146 | 154 | 0   | 0   | 0   | 0   | 97  | 97  | 231 | 231 | 0   | 0   | 118 | 120 |
| 66 | UR312-XY | XY | 260 | 260 | 184 | 192 | 184 | 184 | 154 | 154 | 190 | 193 | 160 | 160 | 122 | 124 | 231 | 231 | 168 | 170 | 116 | 122 |
| 67 | UR302-XY | XY | 260 | 260 | 0   | 0   | 184 | 184 | 149 | 154 | 190 | 193 | 154 | 156 | 106 | 124 | 0   | 0   | 168 | 170 | 118 | 120 |
| 68 | UR304-XX | XX | 260 | 260 | 192 | 192 | 0   | 0   | 0   | 0   | 0   | 0   | 0   | 0   | 106 | 106 | 231 | 231 | 0   | 0   | 116 | 122 |
| 69 | UR279-XX | XX | 260 | 260 | 192 | 192 | 0   | 0   | 0   | 0   | 0   | 0   | 0   | 0   | 97  | 97  | 231 | 231 | 168 | 168 | 116 | 120 |
| 70 | UR292-XY | XY | 260 | 260 | 0   | 0   | 184 | 184 | 0   | 0   | 190 | 190 | 156 | 156 | 112 | 114 | 219 | 219 | 168 | 168 | 116 | 118 |
| 71 | UR121-XY | XY | 260 | 260 | 196 | 200 | 186 | 186 | 146 | 154 | 181 | 185 | 148 | 150 | 97  | 97  | 251 | 251 | 168 | 170 | 118 | 122 |
| 72 | UR131-XY | XY | 260 | 260 | 192 | 196 | 184 | 184 | 146 | 154 | 177 | 193 | 156 | 160 | 126 | 126 | 231 | 231 | 168 | 170 | 118 | 128 |
| 73 | UR214-XY | XY | 260 | 260 | 184 | 200 | 186 | 186 | 154 | 154 | 193 | 193 | 156 | 156 | 106 | 120 | 0   | 0   | 168 | 168 | 111 | 116 |
| 74 | UR241-XY | XY | 260 | 260 | 0   | 0   | 184 | 184 | 149 | 154 | 190 | 193 | 156 | 158 | 108 | 122 | 0   | 0   | 168 | 170 | 118 | 122 |
| 75 | UR81-XY  | XY | 260 | 260 | 188 | 196 | 0   | 0   | 0   | 0   | 177 | 193 | 160 | 160 | 122 | 124 | 231 | 241 | 168 | 170 | 118 | 124 |
| 76 | UR98-XY  | XY | 260 | 260 | 196 | 200 | 186 | 186 | 0   | 0   | 181 | 183 | 145 | 150 | 97  | 97  | 231 | 231 | 168 | 170 | 118 | 120 |
| 77 | UR100-XY | XY | 260 | 260 | 196 | 200 | 186 | 186 | 0   | 0   | 193 | 193 | 158 | 160 | 112 | 120 | 224 | 227 | 160 | 163 | 103 | 105 |
